# Supplementary material
Source: PubMed Central journal article supplement (PMC5692574)
Supplement: pnas.1712350114.sapp.pdf [file pnas.1712350114.sapp.pdf]

## Supporting Information (SI)

**Data.** The fibroblast (FIB) data (Hi-C and RNA-seq) used for this application was originally collected and published in a paper by Chen *et al.* (1). We refer the reader to this paper for a full description of technical protocols. Embryonic Stem Cell (ESC) and myotube (MT) data was downloaded from NCBI-GEO (GSE23316 ENCODE Caltech RNA-seq and GSE52529) (2). 53 different tissue RNA-seq samples were downloaded from GTEx portal (3). 51 different immune cell type RNA-seq samples were obtained from the BLUEPRINT Epigenome project (4).

**Hi-C and Construction of TADs.** We computed TAD boundaries from genome-wide chromosome conformation capture (Hi-C) data using an algorithm described in Chen *et al.* (5). The algorithm was applied to averaged time series Hi-C data from proliferating human fibroblast (FIB) at 100 kilo-base pair (kb) resolution, which identified 2,562 TADs across all autosomal chromosomes (i.e. excluding Chromosomes X and Y). Of the 2,562 TADs, 317 contained no genes and were excluded from our analysis, leaving 2,245 TADs. These TADs ranged in size from a few hundred kb to several Mb, and contained on average 9-10 genes (standard deviation of 18 genes); one gene at minimum, and 249 genes maximum.

**Construction of B Matrix.** TF binding site position frequency matrix (PFM) information was obtained from Neph *et al.* and MotifDB, which is a collection of publicly available PFM databases, such as JASPAR, Jolma *et al.* cispb\_1.02, stamblab, hPDI, and UniPROBE (6, 7). TRANSFAC PFM information was included as well. Motif scanning of the human reference genome (hg19) was performed using FIMO of the MEME suite, in line with methods established by Neph *et al.* (6). DNase-seq information for human fibroblasts was derived from ENCODE for fibroblast (GSM1014531). If a narrow peak is found within the  $\pm 5$ kb of a gene TSS, the region is classified as open. TF function information was determined through an extensive literature search.

**Scaling of RNA-seq.** Due to differences in data collection procedures, the RNA-seq RPKM values obtained from the GTEx portal were of lower value, on average, compared to our fibroblast dataset, thus favoring repressor TFs for  $\mu$  scoring. In order to account for this in our model, we scaled all GTEx RNA-seq data by a factor that solves the equation

$$\underset{\alpha}{\text{minimize}} \quad \|g_{FIB,UM} - \alpha g_{FIB,GTEX}\| \quad [1]$$

where  $g_{FIB,UM}$  is the gene-level RNA-seq vector average of our fibroblast data,  $g_{FIB,GTEX}$  is the gene-level RNA-seq vector of “Cells - Transformed fibroblasts” from the GTEx portal, and  $\alpha$  is a scalar that solves this equation. For this data,  $\alpha = 2.6113$  and all GTEx data used as a target state was scaled by this factor.

**Removal of MicroRNA.** MicroRNA were removed from this analysis due to their high variance in RPKM values and unpredictable function.

**TF Scores - Additional GTEx Data.** For fibroblast to Adipose-Subcutaneous, the highest scoring factor is EBF1, a known maintainer of brown adipocyte identity, and a known promoter of adipogenesis in fibroblasts (8). The 2nd highest scoring marker, PPARG, has been shown to be involved in adipose differentiation, and can be used individually to achieve reprogramming from fibroblasts (9). Curiously, ATF3 is implicated here as being useful for adipocyte differentiation although its function has been shown to repress PPARG and stymie cell proliferation (10). Upon further research, using time dependent addition, ATF3 addition scores best when added towards the end of reprogramming process.

Two Brain tissue samples, cerebellum and hippocampus, predict TFs necessary for natural differentiation. Interestingly, our algorithm selects different TFs for each conversion, with factors linked specifically to each tissue. For cerebellum, NEUROD1, has been shown to be required for granule cell differentiation, while ZIC1 and ZIC4 are both known to promote cerebellar-specific neuronal function (11, 12). The top scoring combination of 3 TFs are all similarly known to be important in neurogenesis (NEUROD1, ZBTB18, UNCX) (13, 14). Hippocampus TF scoring includes FOXG1 as the top predicted factor, a factor specifically needed in hippocampus development. OLIG2, FOXG1, and GPD1 are the top scoring set for hippocampus reprogramming, all of which have been shown to be necessary for hippocampus function.

Colon TF scoring finds known differentiation factor in natural colon secretory lineage development, ATOH1, as the highest scoring individual factor (15). The top scoring combination of 2 TFs includes ATOH1 along with CDX2, another known factor necessary for full differentiation of colon cells, specifically small intestine maturation (16). Liver cell reprogramming similarly finds known factors for differentiation in the top score of all 3 combinations: HNF4A, CUX2, PROX1 (17–19). All TFs play a role in correct development of hepatic progenitor cell-types and hepatic stem cells, the cell types just above in lineage differentiation.

**TF Scores - BLUEPRINT Project Data.** A number of immune cell types extracted from the BLUEPRINT Project revealed promising predicted TF results when fibroblast is used as the starting point (4).  $d_0$  values between cell types are shown in Fig. S4.

For fibroblast to macrophage direct reprogramming, a number of factors scoring highly in our algorithm are known to play a role in macrophage reprogramming or the differentiation. SPI1 (along with CEBPA) has been verified experimentally to reprogram fibroblasts into macrophage-like cells (20). IKZF1 has been shown to be crucial for macrophage polarization via the IRF4/IRF5 pathway (21). MYB has been shown to be crucial for the upstream cell type HSC (22).

For fibroblast to HSC direct reprogramming, the top scoring individual factor is highly associated with the target phenotype and has been shown to support HSC growth and regeneration (23). ERG (in combination with GATA2, LMO2, RUNX1c, and SCL) is a confirmed reprogramming factor for fibroblast to HSC in mice (24).

For fibroblast to erythroblast reprogramming, ERG is a promising factor as it is required for the maintenance of the upstream cell type HSC (24). NFIA is shown to promote the erythroid lineage from HSC differentiation (25).

**Alternative Computation of  $u$ .** Below is an example of how  $u$  can be computed without the constraint that  $u_{k,m} \geq 0$ . Assume  $u_k := \bar{u}$  is constant for all  $t$ . Then

$$x_{k+1} = A_k x_k + B u_k \quad [2]$$

can be written as

$$x_4 = A_3 A_2 A_1 x_1 + C \bar{u}, \quad [3]$$

where

$$C := A_3 A_2 B + A_3 B + B.$$

We seek the control  $\bar{u}$  that minimizes the distance between  $x(3)$  and the target  $x_T$ :

$$\min_{\bar{u}} \|x_T - A_3 A_2 A_1 x_1 - C \bar{u}\|. \quad [4]$$

We can see that an exact solution exists if

$$x_T - A_3 A_2 A_1 x_1 \in \text{span}(C), \quad [5]$$

and is given by

$$A_3 A_2 A_1 x_1 + C \bar{u} = x_T \quad [6]$$

$$C \bar{u} = x_T - A_3 A_2 A_1 x_1 \quad [7]$$

$$\bar{u} = C^\dagger (x_T - A_3 A_2 A_1 x_1), \quad [8]$$

where  $C^\dagger$  denotes the Moore-Penrose pseudoinverse of the matrix  $C$ , computed using the singular value decomposition of  $C$ . Even when Eq. 5 is not satisfied, it is well established that the control Eq. 8 solves Eq. 4.

Define

$$d = \left\| (I_N - C C^\dagger)(x_T - A_3 A_2 A_1 x_1) \right\| \quad [9]$$

$$\mu := d_0 - d_*. \quad [10]$$

$\mu$  can be used to compare between potential TFs for a defined initial state ( $x_I$ ), target state ( $x_T$ ), and TF number ( $p$ ). The larger the value of  $\mu$ , the higher the relative score for its corresponding TF set.

We note that accurate TF predictions for some desired target cell types may not depend on minimizing distance alone, but also the amount of "energy" required for the system to reach  $d_*$ . We denote energy here with  $\mu_2$  and define it as:

$$e(u) = \sum_{k=0}^{K-1} u_k^T \cdot u_k = \mu_2. \quad [11]$$

$\mu_2$  is analogous to the amount of a TF that needs to be added to the system to achieve  $d_*$ . In the case where two different TFs achieve the same  $\mu$  score,  $\mu_2$  can be computed to decide the better candidate (i.e. lower  $\mu_2$  implies a better TF).

**Data Sources.** A summary of the data used for this algorithm is shown below, with citations and accession numbers or website link, where applicable.

- Gene Expression
  - Fibroblast: Chen *et al.* (1)
  - GTEx: <https://www.gtexportal.org/home/> (3)
  - ESC: GSE23316 (2)
  - Myotube: GSE52529 (2)
  - BluePrint Epigenome: <http://www.blueprint-epigenome.eu/> (4)
- DNase-seq
  - Fibroblast: GSM1014531 (26)
- Hi-C TAD boundaries
  - Fibroblast: Chen *et al.* (1)
- TF PWM
  - Neph *et al.* (6)
  - MotifDB + FIMO (7, 27)

**DGC Framework Benchmarking.** In order to set a standard for success, we show here how experimentally validated TFs score well using our algorithm without imposing any TF threshold prior to analysis. Experimental validation of novel predictions will set a better standard for success, and while our lab and collaborators are working towards this goal, this is not a trivial undertaking.

As an initial test, we show here where the Yamanaka factors (KLF4, MYC, SOX2, and POU5F1) rank for fibroblast to embryonic stem cell reprogramming, in comparison to randomly selected combinations of four TFs using our methods ( $n = 669$ ). Results show KLF4, MYC, SOX2, and POU5F1 ranking 12/669 (1.8%). Histogram of scores are depicted in Figure S5.

We also show where MYOD1 ranks for fibroblast to myotube, in comparison to randomly selected TFs ( $n = 669$ , full set of TFs included in our analysis, plus the case where a TF is ranked as both an activator and a repressor). Results show MYOD1 ranking 57/669 (8.6%). Histogram of scores are depicted in Figure S6.

For further statistical analysis, we attempt the benchmarking method performed in Michael *et al.* (28). This paper attempts to solve a conceptually similar problem to the TF prediction problem, where they attempt to predict the control imposed given an initial state, a network, and many target states with known "ground truths" (the TF manipulated to achieve this state is known). Though conceptually similar, our problems are different in the following ways

- Often, there are multiple TF combinations that can result in successful reprogramming to a target state
- The number of TFs used in many validated direct reprogramming experiments is either computationally too time-consuming, is not included in our set of 547, or is used in combination with other molecules that we cannot model currently (e.g. small molecules and inhibitors)

- The data collected from each experiment for a given target state is performed in many different labs using different protocols. We know that this is a limitation in our paper as well, but point this out here for comparison to Michael *et al.* data
- There is a much smaller number of “goal-state expression profiles” in our context, where the TFs for direct reprogramming are known, and are included in our model

Despite these crucial differences, we believe this is a very thorough and convincing benchmarking method, and we have attempted to try this on our dataset.

We first selected 10 validated cell reprogramming experiments where we believe we have a good approximation for the target state, and a sufficient number of the TFs included in our list of 547 TFs. These experimentally verified test cases are derived from PMID: 25658369, 18035408, 18029452, 18849973, 2748593. Figure S7 summarizes the data used for this analysis.

We can evaluate where our algorithm ranked a known reprogramming combination for a target (as a percentile of all combinations scored), without imposing any thresholding.  $n = 669$  for all random TF combinations. Plotting this data similar to Figure 2B and 2C in Michael *et al.* yields Figure S8.

1. Chen H, et al. (2015) Functional organization of the human 4d nucleome. *Proceedings of the National Academy of Sciences* 112(26):8002–8007.
2. Consortium EP, et al. (2012) An integrated encyclopedia of dna elements in the human genome. *Nature* 489(7414):57–74.
3. Lonsdale J, et al. (2013) The genotype-tissue expression (gtex) project. *Nature genetics* 45(6):580–585.
4. Adams D, et al. (2012) Blueprint to decode the epigenetic signature written in blood. *Nature biotechnology* 30(3):224–226.
5. Chen J, Hero A, Rajapakse I (accepted 2016) Spectral identification of topological domains. *Bioinformatics*.
6. Neph S, et al. (2012) Circuitry and dynamics of human transcription factor regulatory networks. *Cell* 150:1274–1286.
7. Shannon P (2014) Motifdb: An annotated collection of protein-dna binding sequence motifs. *R package version 1.0*.
8. Jimenez MA, Åkerblad P, Sigvardsson M, Rosen ED (2007) Critical role for ebf1 and ebf2 in the adipogenic transcriptional cascade. *Molecular and cellular biology* 27(2):743–757.
9. Gregoire FM, Smas CM, Sul HS (1998) Understanding adipocyte differentiation. *Physiological reviews* 78(3):783–809.
10. Jang MK, Kim CH, Seong JK, Jung MH (2012) Atf3 inhibits adipocyte differentiation of 3T3-L1 cells. *Biochemical and biophysical research communications* 421(1):38–43.
11. Miyata T, Maeda T, Lee JE (1999) Neurod is required for differentiation of the granule cells in the cerebellum and hippocampus. *Genes & development* 13(13):1647–1652.
12. Frank CL, et al. (2015) Regulation of chromatin accessibility and zic binding at enhancers in the developing cerebellum. *Nature neuroscience* 18(5):647–656.
13. Cohen J, et al. (2016) Further evidence that de novo missense and truncating variants in zbtb18 cause intellectual disability with variable features. *Clinical Genetics*.
14. Sammeta N, Hardin DL, McClintock TS (2010) Uncx regulates proliferation of neural progenitor cells and neuronal survival in the olfactory epithelium. *Molecular and Cellular Neuroscience* 45(4):398–407.
15. VanDussen KL, Samuelson LC (2010) Mouse atonal homolog 1 directs intestinal progenitors to secretory cell rather than absorptive cell fate. *Developmental biology* 346(2):215–223.
16. Crissey MAS, et al. (2011) Cdx2 levels modulate intestinal epithelium maturity and paneth cell development. *Gastroenterology* 140(2):517–528.
17. DeLaForest A, et al. (2011) Hnf4a is essential for specification of hepatic progenitors from human pluripotent stem cells. *Development* 138(19):4143–4153.
18. Seth A, et al. (2014) Prox1 ablation in hepatic progenitors causes defective hepatocyte specification and increases biliary cell commitment. *Development* 141(3):538–547.
19. Vanden Heuvel GB, et al. (2005) Hepatomegaly in transgenic mice expressing the homeobox gene *cux-1*. *Molecular carcinogenesis* 43(1):18–30.
20. Feng R, et al. (2008) Pu. 1 and *c/ebp $\alpha$ / $\beta$*  convert fibroblasts into macrophage-like cells. *Proceedings of the National Academy of Sciences* 105(16):6057–6062.
21. Bruns H, et al. (2016) The *ikzf1-irf4* axis regulates macrophage polarization and macrophage-mediated anti-tumor immunity.
22. Perdiguero EG, Geissmann F (2016) The development and maintenance of resident macrophages. *Nature immunology* 17(1):2–8.
23. Naudin C, et al. (2017) Pimilio/foxp1 signaling drives expansion of hematopoietic stem/progenitor and leukemia cells. *Blood* 129(18):2493–2506.
24. Batta K, Florkowska M, Kouskoff V, Lacaud G (2014) Direct reprogramming of murine fibroblasts to hematopoietic progenitor cells. *Cell reports* 9(5):1871–1884.
25. Starnes L, et al. (2010) A transcriptome-wide approach reveals the key contribution of *nfi-a* in promoting erythroid differentiation of human [cd34. sup.+] progenitors and cml cells. *Leukemia* 24(6):1220–1224.
26. Thurman RE, et al. (2012) The accessible chromatin landscape of the human genome. *Nature* 489(7414):75–82.
27. Grant C, Bailey T, Noble W (2011) Fimo: scanning for occurrences of a given motif. *Bioinformatics* 27(7):1017–1018.
28. Michael DG, et al. (2016) Model-based transcriptome engineering promotes a fermentative transcriptional state in yeast. *Proceedings of the National Academy of Sciences* 113(47):E7428–E7437.
29. Whitfield M, et al. (2002) Identification of genes periodically expressed in the human cell cycle and their expression in tumors. *Molecular biology of the cell* 13.6:1977–2000.

SI Figures.

DRAFT

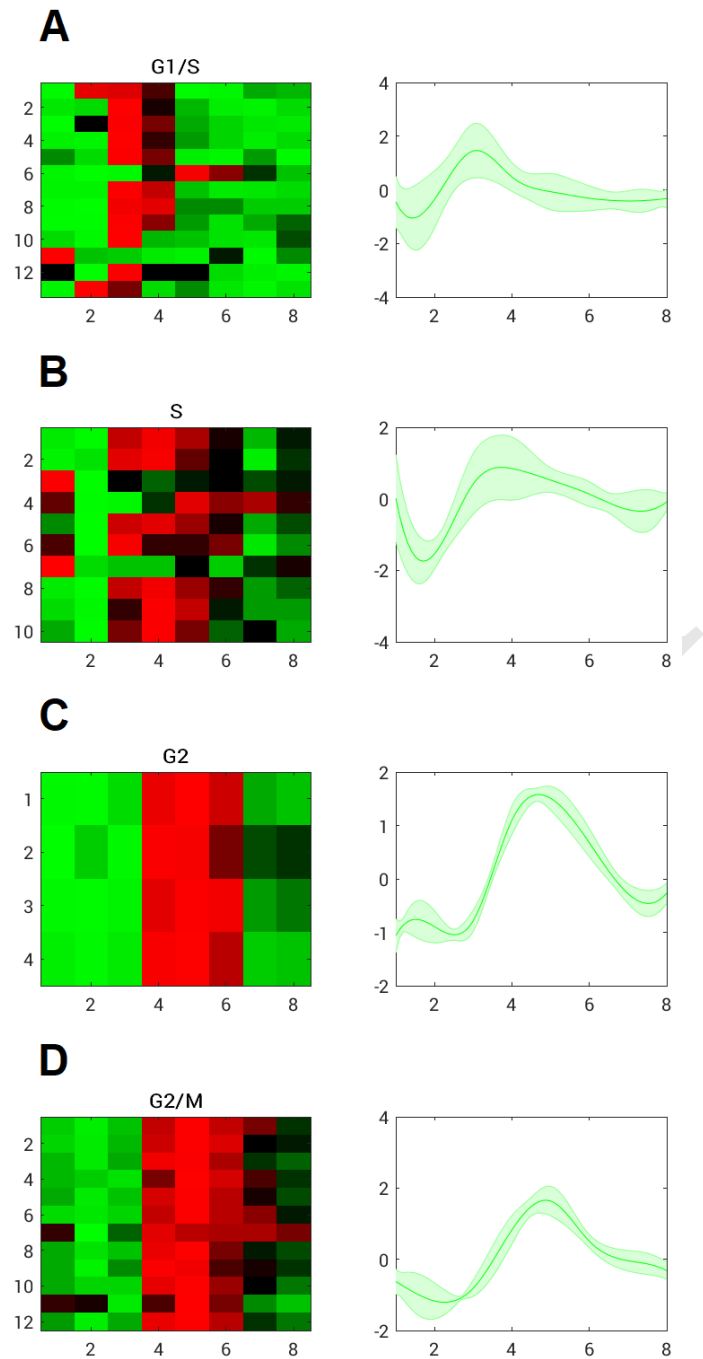

**Fig. S1.** Analysis of cell cycle marker gene expression. Gene expression RNA-seq data for 39 genes that have been shown in the literature to be cell cycle regulated (29). Cell cycle phases shown include (A) G<sub>1</sub>/S, (B) S, (C) G<sub>2</sub>, (D) G<sub>2</sub>/M. Raw data of gene expression over time (left), with smoothed/interpolated expression over time with standard deviation (right). The expression curves for each gene have been standardized by subtracting their mean and dividing by the standard deviation over the eight time points. x-axis denotes sample time point  $k$ , referring to 0, 8, 16, . . . , 56 h after growth medium introduction. y-axis is normalized expression.

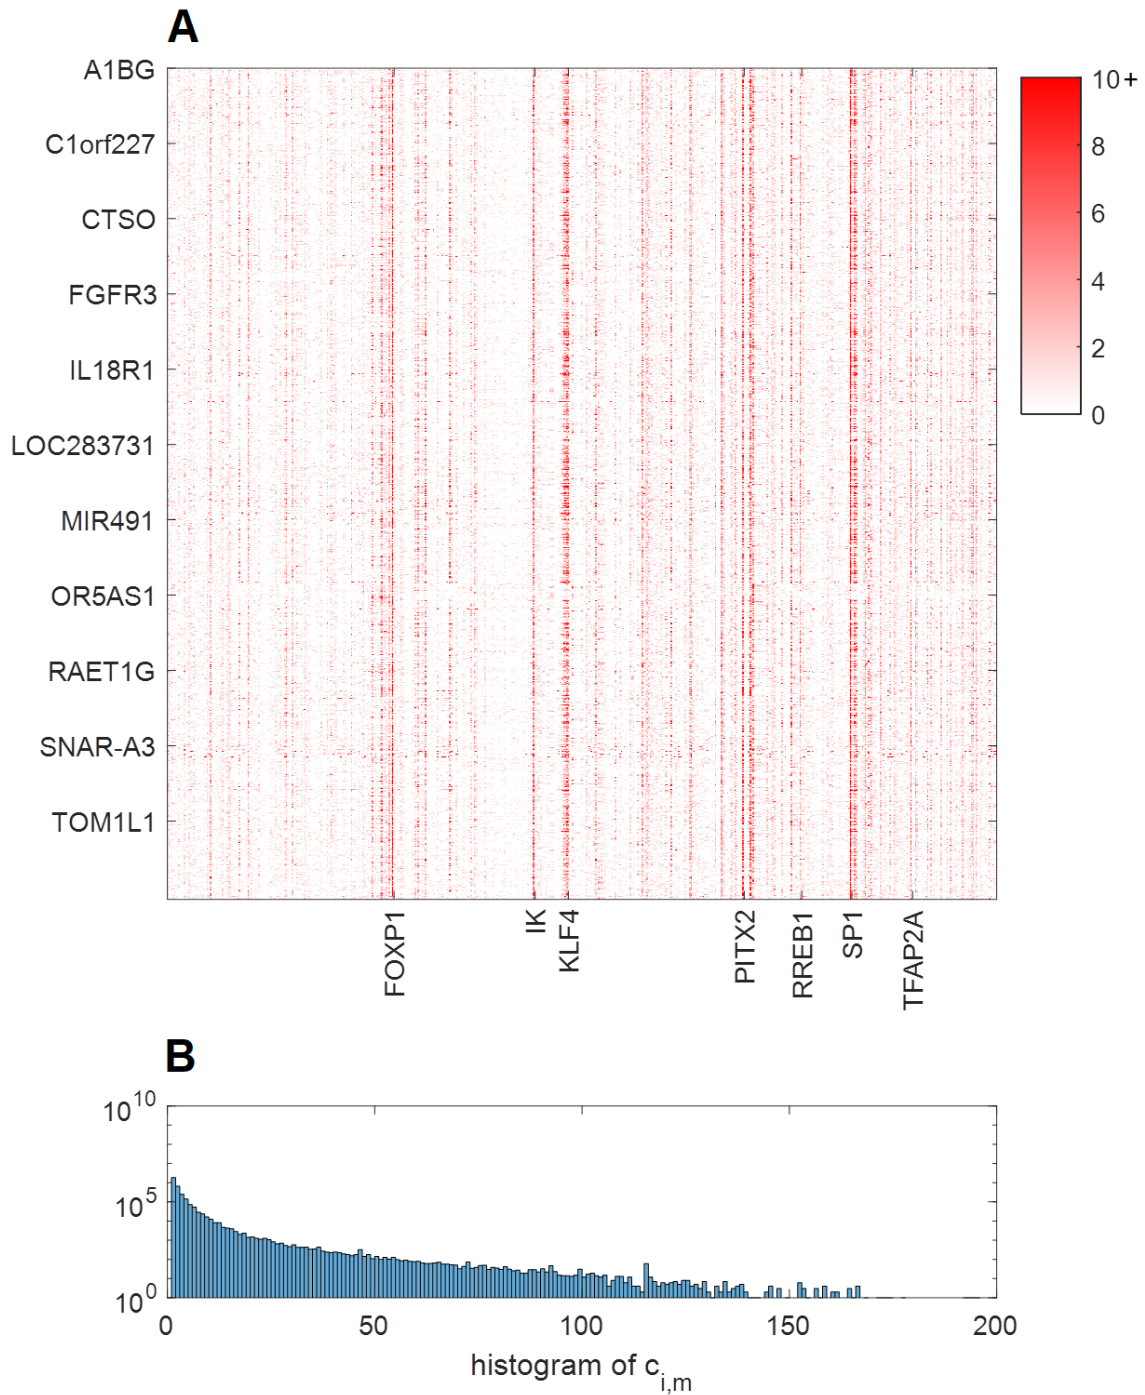

**Fig. S2.** Visualization of input matrix **B**. (A) Visualization of the  $22,083 \times 547$   $c_{i,m}$  matrix: identified TF-to-gene interactions based on TFBSs. The color at entry  $(i, m)$  represents how many TF  $m$  TFBSs were observed within  $\pm 5\text{kb}$  of gene  $i$ 's TSS. The color axis has been truncated to  $[0, 10]$  but note that more than 10 TFBSs were observed for many (gene,TF) pairs. Certain columns (TFs) are dramatically highlighted compared to others, some of which have been labeled by name along the horizontal axis. Some gene names are labeled along the vertical axis, none of which particularly stand out. Both genes and TFs are sorted alphabetically. (B) A histogram for the non-zero values of  $c_{i,m}$ . The log-scale on the vertical axis emphasizes that most of the gene TSS regions contain much less than 25 TFBSs for a given TF. The *SP1* TFBS, for example, is observed 249 times in a 10kb TSS centered on a gene.

**A**

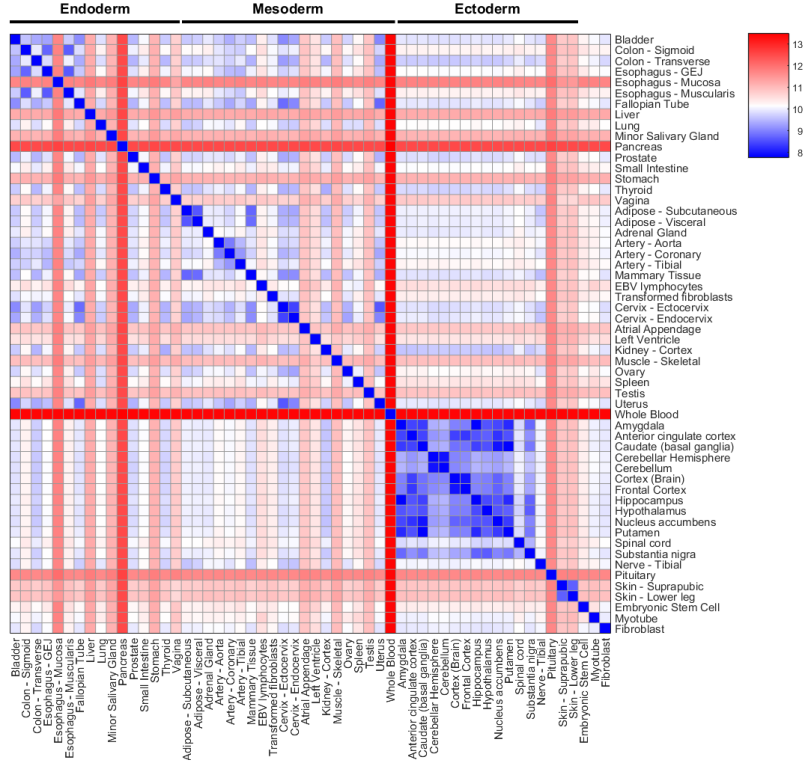

**B**

|                  | ESC               |       | Myotube            |       | Adipose - Subcutaneous |       | Brain - Cerebellum    |       | Brain - Hippocampus |       | Colon - Transverse |       | Heart - Left Ventricle |       | Liver             |       |
|------------------|-------------------|-------|--------------------|-------|------------------------|-------|-----------------------|-------|---------------------|-------|--------------------|-------|------------------------|-------|-------------------|-------|
|                  | $\mu$             | $\mu$ | $\mu$              | $\mu$ | $\mu$                  | $\mu$ | $\mu$                 | $\mu$ | $\mu$               | $\mu$ | $\mu$              | $\mu$ | $\mu$                  | $\mu$ | $\mu$             | $\mu$ |
| Combination of 1 | MYCN              | 2634  | MYOG               | 1753  | EBF1                   | 2839  | NEUROD1               | 2230  | FOXC1               | 372   | ATOH1              | 1814  | HEY2                   | 78    | HNF4A             | 81    |
|                  | ZFP42             | 2453  | MYOD1              | 1065  | PPARG                  | 2666  | ZIC1                  | 1725  | KCNIP1              | 121   | HNF4A              | 1693  | IRX4                   | 57    | GATA4             | 62    |
|                  | NANOG             | 2013  | PKNOX2             | 797   | TAL1                   | 2182  | EGRA                  | 1622  | NR2E1               | 103   | ZBTB7C             | 1589  | HIST2H2BE              | 44    | ATF5              | 62    |
|                  | OTX2              | 1628  | SIX2               | 745   | GPD1                   | 1939  | ZIC4                  | 1517  | HEY1                | 62    | MYB                | 1483  | HAND1                  | 17    | GPD1              | 47    |
|                  | SOX2              | 1025  | PITX2              | 744   | FOS                    | 1683  | GPD1                  | 1123  | GPD1                | 61    | SPIB               | 1381  | SOX7                   | 1     | FOXA2             | 36    |
|                  | FOXD3             | 0     | MEF2C              | 675   | ERG                    | 1582  | PAX6                  | 977   | SCR11               | 41    | HNF4G              | 1314  | GATA4                  | 0     | NR1I2             | 34    |
|                  | NR6A1             | 0     | MYF6               | 136   | SOX17                  | 1165  | PKNOX2                | 956   | KLF15               | 27    | NR1I2              | 1313  | MEOX1                  | 0     | HNF1A             | 29    |
|                  | POU5F1            | 0     | PKNOX2             | 0     | MEF2C                  | 1018  | ETV1                  | 788   | BHLHE22             | 0     | EHF                | 1279  | SOX18                  | 0     | GLYCK             | 27    |
|                  | ZIC2              | 0     | SIX2               | 0     | MAFB                   | 945   | HSF4                  | 683   | HLF                 | 0     | FOS                | 814   | KLF15                  | 0     | MAFB              | 23    |
|                  |                   |       |                    |       | MEOX1                  | 733   | NFIA                  | 636   | OLIG1               | 0     | HOXB9              | 786   | HIST2H2BE              | 0     | FOXA1             | 15    |
| Combination of 2 | MYCN,ZFP42        | 2746  | MYOG,PKNOX2        | 1804  | EBF1,ATF3              | 2910  | NEUROD1,ZBTB18        | 2230  | FOXC1,GPD1          | 428   | ATOH1,CDX2         | 1856  | GATA4,HEY2             | 141   | HNF4A,PROX1       | 95    |
|                  | MYCN,NANOG        | 2704  | MYOG,SIX2          | 1766  | EBF1,FOS               | 2883  | NEUROD1,UNCX          | 2083  | OLIG2,FOXC1         | 389   | ATOH1,ZBTB7C       | 1840  | SOX7,IRX4              | 120   | HNF4A,CUX2        | 93    |
|                  | MYCN,OTX2         | 2672  | MEF2C,MYOG         | 1753  | EBF1,SOX7              | 2871  | NEUROD1,EN2           | 2069  | FOXC1,NR2E1         | 385   | ATOH1,IRF8         | 1836  | GATA4,IRX4             | 117   | HNF4A,GPD1        | 82    |
|                  | MYCN,POU5F1       | 2634  | MYF6,MYOG          | 1753  | EBF1,GPD1              | 2857  | NEUROD1,SOX15         | 1983  | FOXC1,KCNIP1        | 379   | ATOH1,HOXB3        | 1832  | HEY2,SOX7              | 114   | HNF4A,MAFB        | 81    |
|                  | MYCN,SOX2         | 2634  | MYOD1,MYOG         | 1753  | EBF1,IRF8              | 2854  | NEUROD1,VSX1          | 1943  | HLF,FOXC1           | 374   | ATOH1,ISX          | 1830  | HEY2,IRX4              | 93    | HNF4A,GLYCK       | 81    |
|                  | MYCN,FOX3         | 2634  | MYOG,PITX2         | 1753  | EBF1,PPARG             | 2852  | ZIC1,UNCX             | 1927  | SOX2,FOXC1          | 373   | ATOH1,NKX3-2       | 1828  | GATA4,HIST2H2BE        | 93    | ATF5,HNF4A        | 81    |
|                  | MYCN,NR6A1        | 2634  | MYOG,PKNOX2        | 1753  | EBF1,BHLHE40           | 2849  | NEUROD1,KCNIP1        | 1904  | ATOH1,SPIB          | 372   | ATOH1,SPIB         | 1826  | HEY2,HIST2H2BE         | 84    | ELF3,HNF4A        | 81    |
|                  | MYCN,ZIC2         | 2634  | MYOG,SIX2          | 1753  | EBF1,ERG               | 2847  | ZIC1,ZBTB18           | 1903  | POU3F3,FOXC1        | 372   | ATOH1,HNF4A        | 1822  | SOX7,HIST2H2BE         | 83    | FOXA1,HNF4A       | 81    |
|                  | ZFP42,POU5F1      | 2523  | MYOD1,SIX2         | 1069  | EBF1,HEY1              | 2844  | NEUROD1,PKNOX2        | 1900  | SOX10,FOXC1         | 372   | ATOH1,HOXB9        | 1821  | MEOX1,HEY2             | 80    | FOXA2,HNF4A       | 81    |
|                  | NANOG,ZFP42       | 2454  | MYOD1,PKNOX2       | 1067  | EBF1,MAFB              | 2844  | ZIC1,EN2              | 1894  | SOX21,FOXC1         | 372   | ATOH1,HAND1        | 1821  | SOX18,HEY2             | 78    | GATA4,HNF4A       | 81    |
| Combination of 3 | MYCN,NANOG,POU5F1 | 2840  | MYOG,SIX2,PKNOX2   | 1804  | EBF1,FOS,ATF3          | 2947  | NEUROD1,ZBTB18,UNCX   | 2328  | OLIG2,FOXC1,GPD1    | 445   | ATOH1,SPIB,CDX2    | 1947  | GATA4,HEY2,IRX4        | 263   | HNF4A,CUX2,PROX1  | 106   |
|                  | MYCN,ZFP42,POU5F1 | 2801  | MEF2C,MYOG,PKNOX2  | 1804  | EBF1,PPARG,ATF3        | 2944  | NEUROD1,ZBTB18,EN2    | 2304  | FOXC1,GPD1,KCNIP1   | 430   | ATOH1,SPIB,IRF8    | 1903  | GATA4,HEY2,HIST2H2BE   | 218   | HNF4A,PROX1,MAFB  | 96    |
|                  | MYCN,NANOG,ZFP42  | 2747  | MYF6,MYOG,PKNOX2   | 1804  | EBF1,ATF3,SOX7         | 2931  | NEUROD1,ZBTB18,KCNIP1 | 2279  | FOXC1,GPD1,NR2E1    | 430   | ATOH1,HNF4A,CDX2   | 1893  | HEY2,SOX7,IRX4         | 190   | GATA4,HNF4A,PROX1 | 95    |
|                  | MYCN,OTX2,ZFP42   | 2746  | MYOD1,MYOG,PKNOX2  | 1804  | EBF1,ATF3,ERG          | 2925  | NEUROD1,ZIC1,ZBTB18   | 2279  | HLF,FOXC1,GPD1      | 428   | ATOH1,CDX2,ZBTB7C  | 1884  | GATA4,HAND1,HEY2       | 166   | ATF5,HNF4A,PROX1  | 95    |
|                  | MYCN,SOX2,ZFP42   | 2746  | MYOG,PITX2,PKNOX2  | 1804  | EBF1,ATF3,GPD1         | 2924  | NEUROD1,ZBTB18,SOX15  | 2263  | OLIG1,FOXC1,GPD1    | 428   | ATOH1,SPIB,HOXB3   | 1873  | GATA4,HIST2H2BE,IRX4   | 159   | HNF4A,PROX1,GLYCK | 95    |
|                  | MYCN,ZFP42,FOX3   | 2746  | MYOG,PKNOX2,PKNOX2 | 1804  | EBF1,FOS,SOX7          | 2921  | EGRA,NEUROD1,ZBTB18   | 2262  | POU3F3,FOXC1,GPD1   | 428   | ATOH1,CDX2,HOXB9   | 1868  | HEY2,SOX7,HIST2H2BE    | 147   | HNF4A,PROX1,GPD1  | 95    |
|                  | MYCN,ZFP42,NR6A1  | 2746  | MYOG,PKNOX2,SIX2   | 1804  | EBF1,ATF3,MAFB         | 2919  | NEUROD1,ZBTB18,VSX1   | 2250  | SOX10,FOXC1,GPD1    | 428   | ATOH1,IRF8,ZBTB7C  | 1862  | GATA4,HEY2,SOX7        | 143   | ELF3,HNF4A,PROX1  | 95    |
|                  | MYCN,ZFP42,ZIC2   | 2746  | MEF2C,MYOG,SIX2    | 1766  | EBF1,ATF3,IRF8         | 2918  | NEUROD1,ZBTB18,ZIC4   | 2234  | SOX2,FOXC1,GPD1     | 428   | ATOH1,SPIB,NKX3-2  | 1861  | GATA4,SOX7,IRX4        | 141   | FOXA1,HNF4A,PROX1 | 95    |
|                  | MYCN,OTX2,POU5F1  | 2716  | MYF6,MYOG,SIX2     | 1766  | EBF1,ATF3,BHLHE40      | 2917  | NEUROD1,ZBTB18,HSF4   | 2234  | SOX21,FOXC1,GPD1    | 428   | ATOH1,SPIB,ISX     | 1860  | GATA4,MEOX1,HEY2       | 141   | FOXA2,HNF4A,PROX1 | 95    |
|                  | MYCN,NANOG,OTX2   | 2704  | MYOD1,MYOG,SIX2    | 1766  | EBF1,FOS,GPD1          | 2916  | NEUROD1,ZBTB18,GPD1   | 2231  | SOX8,FOXC1,GPD1     | 428   | ATOH1,NR1I2,CDX2   | 1860  | GATA4,SOX18,HEY2       | 141   | HLF,HNF4A,PROX1   | 95    |

**Fig. S3.** Quantitative measure between cell types and TF scores. (A)  $d_0$  values between all GTEx tissue types. (B) TF scores for an extended list of target cell types.  $x_I$  = fibroblast.

**A**

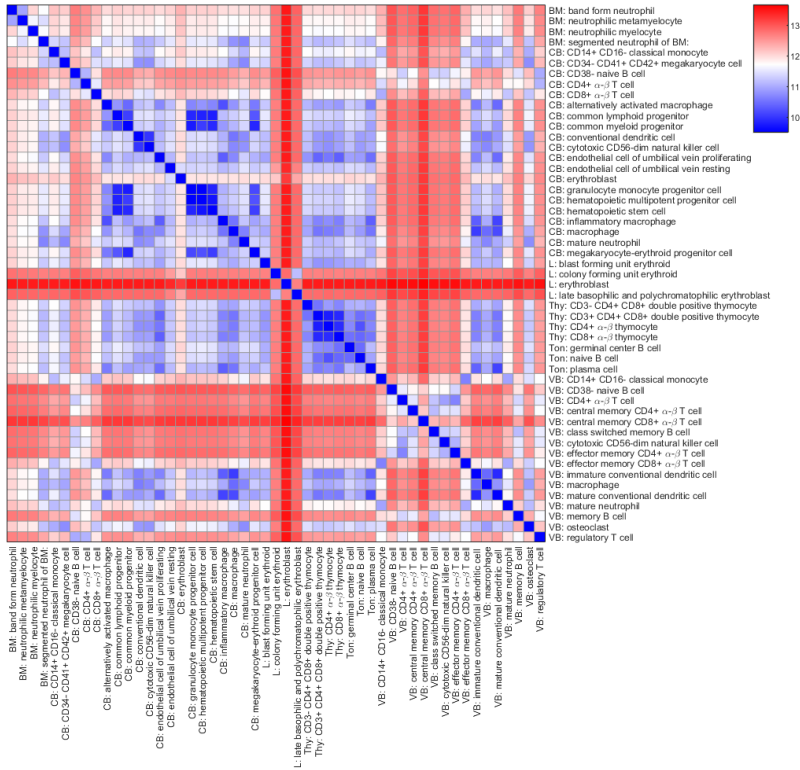

**B**

|                  | Cord Blood - HSC   |       | Cord Blood - HMPP  |       | Cord Blood - Macrophage |       | Cord Blood - B cell |       | Cord Blood - Neutrophil |       | Cord Blood - Erythroblast |       | Cord Blood - Natural Killer cell |       | Cord Blood - Megakaryocyte cell |      |
|------------------|--------------------|-------|--------------------|-------|-------------------------|-------|---------------------|-------|-------------------------|-------|---------------------------|-------|----------------------------------|-------|---------------------------------|------|
|                  | $\mu$              | $\mu$ | $\mu$              | $\mu$ | $\mu$                   | $\mu$ | $\mu$               | $\mu$ | $\mu$                   | $\mu$ | $\mu$                     | $\mu$ | $\mu$                            | $\mu$ | $\mu$                           |      |
| Combination of 1 | FOXP1              | 6304  | FOXP1              | 5550  | EHF                     | 1724  | FL11                | 5850  | GZF1                    | 2770  | ERG                       | 3915  | MYB1                             | 1657  | MYB                             | 3363 |
|                  | IKZF1              | 5704  | HMBX1              | 4960  | IKZF1                   | 1705  | REL                 | 5768  | MYB                     | 2693  | NFIA                      | 3850  | REL                              | 833   | FL11                            | 2691 |
|                  | SPI1               | 5568  |                    | 4707  | SPI1                    | 1568  | RUNX3               | 5694  | CREB5                   | 2618  | TFEC                      | 3775  | IKZF3                            | 794   | SPI1                            | 2618 |
|                  | TAL1               | 5403  | ERG                | 4427  | MYB                     | 1556  | SPI1                | 5393  | FOXO3                   | 2303  | MYB                       | 3611  | RUNX3                            | 737   | IKZF3                           | 2523 |
|                  | ERG                | 5343  | FL11               | 4352  | BHLHE41                 | 1485  | PAX5                | 5209  | ERG                     | 2199  | ATF3                      | 3608  | HMBX1                            | 726   | PAX5                            | 2520 |
|                  | HMBX1              | 5316  | MYB                | 4291  | ITGB2                   | 1393  | IKZF1               | 5095  | REL                     | 2198  | LMO2                      | 3493  | ERG                              | 713   | IKZF1                           | 2519 |
|                  | MYB                | 5296  | SOX4               | 4213  | REL                     | 1323  | IKZF3               | 4977  | SPI1                    | 2159  | NFE2                      | 3357  | FL11                             | 703   | ITGB2                           | 2470 |
|                  | FL11               | 5221  | ZNF350             | 4148  | BATF                    | 1256  | HMBX1               | 4880  | IKZF1                   | 2136  | IKZF1                     | 3347  | IKZF1                            | 603   | BATF                            | 2457 |
|                  | ITGB2              | 4918  | LMO2               | 3900  | TFEC                    | 1206  | ITGB2               | 4755  | RUNX3                   | 2126  | TAL1                      | 3346  | BATF                             | 614   | SPIB                            | 2380 |
|                  | LMO2               | 4875  | ITGB2              | 3811  | LMO2                    | 1116  | TCF7                | 4655  | BATF                    | 1981  | ITGB2                     | 3176  | IRF4                             | 573   | NFE2                            | 2301 |
| Combination of 2 | FOXP1,HMBX1        | 6554  | FOXP1,HMBX1        | 5877  | IKZF1,LMO2              | 2052  | FL11,HMBX1          | 6253  | MYB,TAL1                | 3596  | ERG,ZSCAN16               | 4139  | IKZF2,MYB1                       | 2490  | MYB,TAL1                        | 4160 |
|                  | ERG,FOXP1          | 6341  | FOXP1,CHD2         | 5636  | EHF,LMO2                | 1958  | REL,HMBX1           | 6148  | MYB,LMO2                | 3346  | ERG,TFEC                  | 4056  | MYB1,LMO2                        | 2488  | MYB,LMO2                        | 3964 |
|                  | SPI1,FOXP1         | 6334  | FOXP1,NFIA         | 5621  | SPI1,LMO2               | 1787  | FL11,FOXP1          | 6071  | CREB5,GZF1              | 3070  | ERG,E2F2                  | 4053  | MYB1,IKZF1                       | 2443  | MYB,IKZF1                       | 3903 |
|                  | FOXP1,CHD2         | 6325  | FOXP1,SOX4         | 5604  | IKZF1,TFEC              | 1772  | HMBX1,RUNX3         | 6049  | MYB,CHD2                | 3030  | ERG,NFIA                  | 4047  | GF11,MYB1                        | 2174  | MYB,GF11B                       | 3680 |
|                  | FL11,FOXP1         | 6324  | FOXP1,TFEC         | 5590  | IKZF1,ITGB2             | 1759  | REL,FOXP1           | 5992  | MYB,GZF1                | 2995  | ERG,HMBX1                 | 4035  | MYB1,ITGB2                       | 2169  | MYB,ITGB2                       | 3674 |
|                  | FOXP1,ZBTB16       | 6321  | FOXP1,ZNF350       | 5590  | EHF,IKZF1               | 1756  | RUNX3,CHD2          | 5987  | MYB,ITGB2               | 2975  | NFIA,TFEC                 | 4030  | RORA,MYB1                        | 2096  | MYB,TFEC                        | 3600 |
|                  | FOXP1,IKZF1        | 6318  | FOXP1,ITGB2        | 5580  | EHF,TFEC                | 1756  | FL11,REL            | 5978  | MYB,IKZF1               | 2936  | NFIA,ZSCAN16              | 4026  | MYB1,RUNX3                       | 2063  | MYB,MEIS1                       | 3566 |
|                  | MYB,FOXP1          | 6316  | FOXP1,LMO2         | 5568  | EHF,ITGB2               | 1743  | FL11,RUNX3          | 5943  | MYB,GF11B               | 2923  | ERG,E2F8                  | 3993  | MYB1,ZBTB16                      | 2036  | MYB,ZBTB16                      | 3469 |
|                  | ITGB2,FOXP1        | 6313  | FOXP1,IKZF1        | 5559  | EHF,HMBX1               | 1732  | FL11,TCF7           | 5927  | MYB,RUNX3               | 2910  | ERG,ITGB2                 | 3945  | BC16B,MYB1                       | 1966  | MYB,HMBX1                       | 3382 |
|                  | FOXP1,TAL1         | 6312  | FOXP1,ZBTB16       | 5554  | BHLHE41,EHF             | 1728  | FL11,CHD2           | 5927  | CREB5,MYB               | 2833  | ATF3,ERG                  | 3941  | NF1B,MYB1                        | 1925  | MYB,IKZF3                       | 3375 |
| Combination of 3 | FOXP1,HMBX1,ZBTB16 | 6713  | FOXP1,HMBX1,SOX4   | 6197  | EHF,IKZF1,LMO2          | 2243  | FL11,HMBX1,FOXP1    | 7071  | MYB,GZF1,TAL1           | 4151  | ATF3,ERG,E2F2             | 4504  | MYB1,ZBTB16,LMO2                 | 2736  | MYB,GF11B,LMO2                  | 4282 |
|                  | FOXP1,HMBX1,HOXA6  | 6600  | FOXP1,HMBX1,ZBTB16 | 6005  | BHLHE41,IKZF1,LMO2      | 2142  | REL,HMBX1,FOXP1     | 6882  | CREB5,MYB,TAL1          | 4051  | ERG,NFIA,ZSCAN16          | 4457  | IKZF2,MYB1,LMO2                  | 2717  | MYB,GF11B,TAL1                  | 4246 |
|                  | ERG,FOXP1,HMBX1    | 6576  | FOXP1,HMBX1,NFIA   | 5984  | EHF,MYB,LMO2            | 2083  | HMBX1,RUNX3,FOXP1   | 6614  | MYB,CHD2,TAL1           | 3825  | ERG,TFEC,E2F2             | 4435  | IKZF2,MYB1,HMBX1                 | 2675  | MYB,IKZF1,TAL1                  | 4240 |
|                  | SPI1,FOXP1,CHD2    | 6576  | FOXP1,HMBX1,ZNF350 | 5969  | MYB,IKZF1,LMO2          | 2083  | FL11,TCF7,FOXP1     | 6563  | FOXO3,MYB,TAL1          | 3783  | ERG,TFEC,ZSCAN16          | 4406  | MYB1,IKZF1,ZBTB16                | 2603  | MYB,ITGB2,TAL1                  | 4219 |
|                  | FOXP1,HMBX1,CHD2   | 6572  | FOXP1,HMBX1,CHD2   | 5953  | IKZF1,LMO2,ZBTB16       | 2078  | SPI1,HMBX1,FOXP1    | 6457  | MYB,GZF1,LMO2           | 3747  | ERG,NFIA,E2F2             | 4364  | MYB1,IKZF1,LMO2                  | 2564  | MYB,LMO2,TAL1                   | 4204 |
|                  | FL11,FOXP1,HMBX1   | 6566  | MEIS1,FOXP1,HMBX1  | 5948  | CEBPA,IKZF1,LMO2        | 2072  | FL11,HMBX1,IKZF1    | 6398  | CREB5,MYB,LMO2          | 3720  | NFIA,TFEC,ZSCAN16         | 4354  | IKZF2,MYB1,IKZF1                 | 2562  | MYB,TAL1,TFEC                   | 4201 |
|                  | SPI1,FOXP1,HMBX1   | 6565  | FOXP1,HMBX1,BBX    | 5937  | BHLHE41,EHF,LMO2        | 2070  | FL11,REL,FOXP1      | 6391  | MYB,ZBTB16,TAL1         | 3649  | ATF3,NFIA,E2F2            | 4324  | BC16B,MYB1,LMO2                  | 2560  | MYB,IKZF3,TAL1                  | 4192 |
|                  | ITGB2,FOXP1,HMBX1  | 6564  | FOXP1,HMBX1,TFEC   | 5915  | IKZF1,ITGB2,LMO2        | 2068  | FL11,IKZF3,FOXP1    | 6374  | MYB,LMO2,TAL1           | 3635  | NFIA,TFEC,E2F2            | 4286  | GF11,MYB1,LMO2                   | 2559  | MYB,IKZF3,LMO2                  | 4179 |
|                  | FOXP1,HMBX1,NFIA   | 6560  | FOXP1,HMBX1,LMO2   | 5904  | IKZF1,HMBX1,LMO2        | 2052  | FL11,RUNX3,CHD2     | 6344  | MYB,ITGB2,TAL1          | 3633  | ERG,MYB,ZSCAN16           | 4272  | IKZF2,MYB1,ITGB2                 | 2558  | MYB,HMBX1,TAL1                  | 4168 |
|                  | FOXP1,HMBX1,TFEC   | 6560  | FOXP1,HMBX1,LMO2   | 5904  | IKZF1,HMBX1,LMO2        | 2052  | RUNX3,CHD2,FOXP1    | 6332  | MYB,GF11B,TAL1          | 3630  | ATF3,MYB,E2F2             | 4263  | REL,MYB1,LMO2                    | 2548  | MYB,TAL1,ZBTB16                 | 4164 |

Fig. S4. Quantitative measure between cell types and TF scores for BLUEPRINT Project database. (A)  $d_0$  values between BLUEPRINT Project cell types. (B) TF scores for an extended list of target cell types.  $x_I =$  fibroblast.



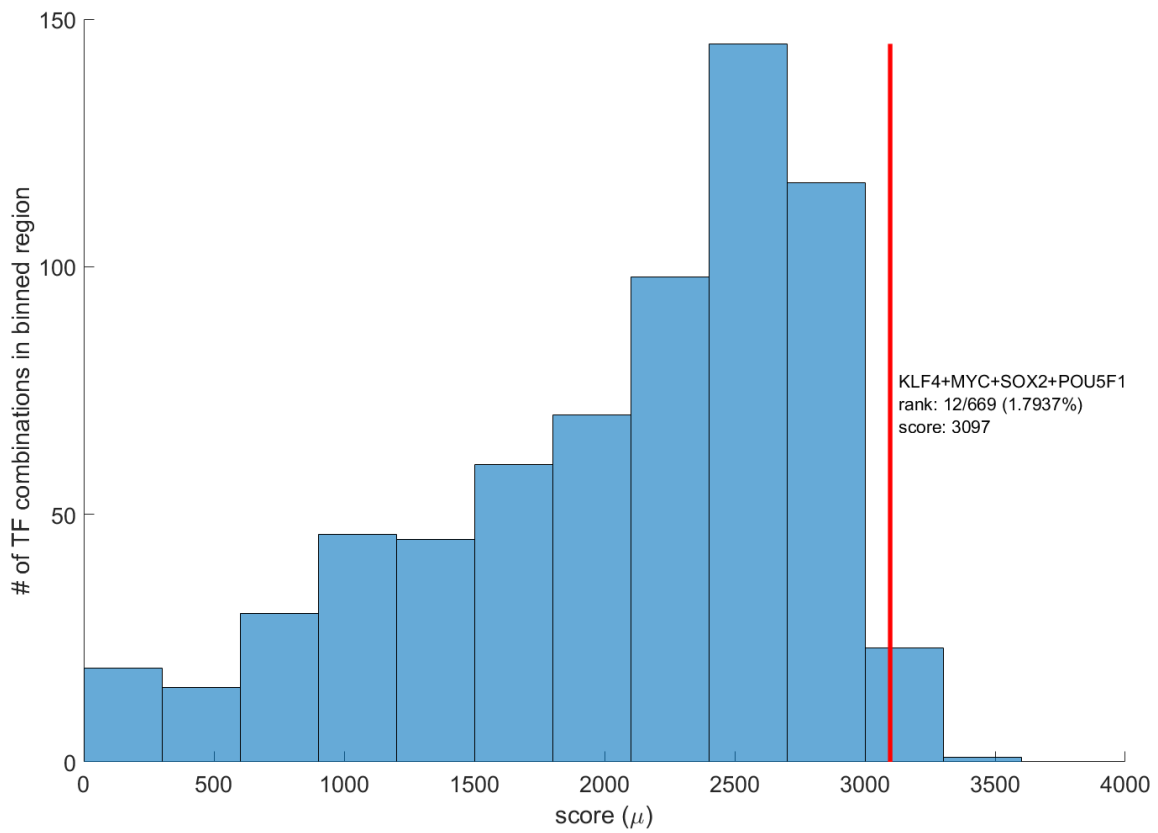

**Fig. S5.** Histogram of TF scores for fibroblast to ESC reprogramming, for combinations of 4 TFs, without imposing any overexpression thresholding. We show here where the known reprogramming TF combination "Yamanaka Factors" (KLF4, MYC, SOX2, and POU5F1) rank in comparison to randomly selected combinations using our methods ( $n = 669$ ). Results show KLF4, MYC, SOX2, and POU5F1 ranking 12/669 (1.8%).

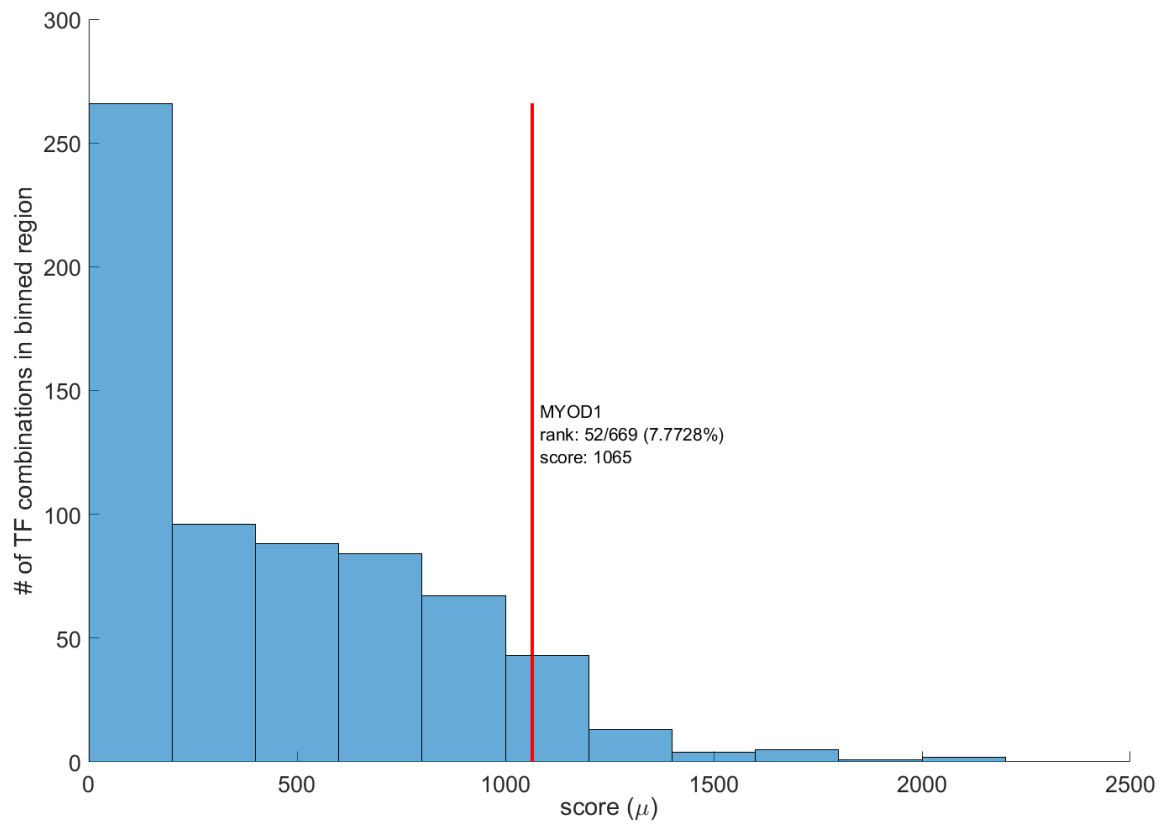

**Fig. S6.** Histogram of TF scores for fibroblast to myotube reprogramming, for combinations of 1 TFs, without imposing any overexpression thresholding. We show here where MYOD1 ranks in comparison to randomly selected TFs using our methods ( $n = 669$ ). Results show MYOD1 ranking 52/669 (7.8%).

| Initial cell population | Target cell type | Target cell type expression profile used | "Ground truth" Transcription factors and other inputs | Inputs in our dataset (%)                   |
|-------------------------|------------------|------------------------------------------|-------------------------------------------------------|---------------------------------------------|
| Fibroblast              | ESC              | ESC (GEO: GSE23316)                      | SOX2, POU5F1, KLF4, MYC                               | SOX2, POU5F1, KLF4, MYC (100%)              |
| Fibroblast              | ESC              | ESC (GEO: GSE23316)                      | SOX2, POU5F1, NANOG                                   | SOX2, POU5F1, NANOG (100%)                  |
| Fibroblast              | ESC              | ESC (GEO: GSE23316)                      | SOX2, POU5F1                                          | SOX2, POU5F1 (100%)                         |
| Fibroblast              | Myotube          | Myotube (GEO: GSE52529)                  | MYOD1                                                 | MYOD1 (100%)                                |
| Fibroblast              | Skeletal Muscle  | Skeletal Muscle (GTEX)                   | MYOD1                                                 | MYOD1 (100%)                                |
| Fibroblast              | Hepatocyte       | Liver (GTEX)                             | HNF1A, HNF4A, HNF6, CEBPA, ATF5, PROX1, p53-siRNA MYC | HNF1A, HNF4A, CEBPA, ATF5, PROX1, MYC (75%) |
| Fibroblast              | Hepatocyte       | Liver (GTEX)                             | HNF1A, HNF4A, FOXA3, SV40 large T antigen             | HNF1A, HNF4A (50%)                          |
| Fibroblast              | Neuron           | Neuron (PMID: 25186741)                  | SOX10                                                 | SOX10 (100%)                                |
| Fibroblast              | Neuron           | Neuron (PMID: 25186741)                  | SOX2                                                  | SOX2 (100%)                                 |
| Fibroblast              | Neuron           | Neuron (PMID: 25186741)                  | POU3F2, ASCL1, MYT1L, LHX3, MNX1, ISL1, NEUROG2       | POU3F2, LHX3, MNX1, ISL1, NEUROG2 (71%)     |

**Fig. S7.** Table overview of target states and target TF combinations for statistical benchmarking.

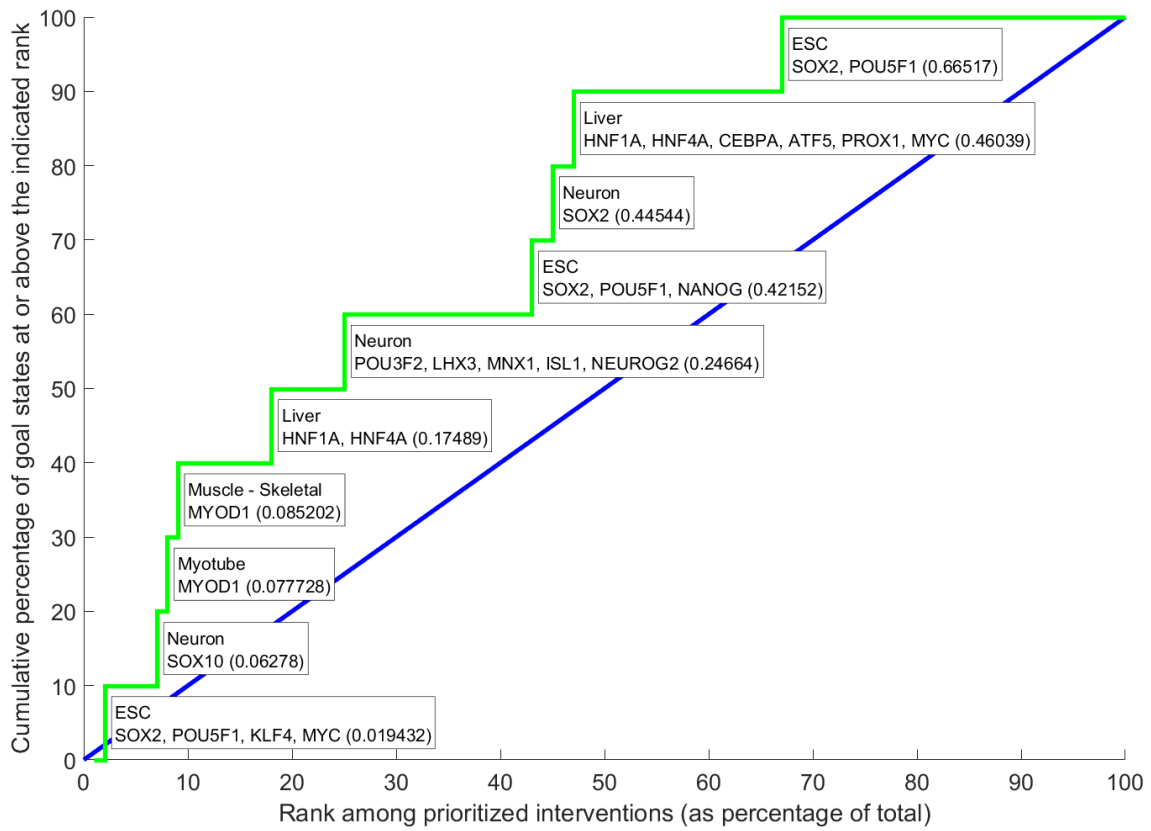

**Fig. S8.** Cumulative percentage of correct predictions (TFs that have been experimentally validated; y-axis) selected above the percentage rank indicated on the x-axis. The 10 goal states used are shown in Table S7. Text boxes show where a given goal state ranked, with the number in parenthesis giving the exact rank in proportion to all TFs ranked. Our algorithm ranks known reprogramming TFs (green) above what would be expected by random chance (blue), without relying on TF overexpression.
